# Supplementary material for: Identification of Common Prognostic Gene Expression Signatures with Biological Meanings from Microarray Gene Expression Datasets
Source: PubMed Central journal article supplement (PMC3448701; doi:10.1371/journal.pone.0045894), 2012-09-21

Yao et al, Fig.S2, Identification of chromosome 10 genes as good prognostic candidate genes in 437 glioblastomas from recently updated TCGA dataset

a

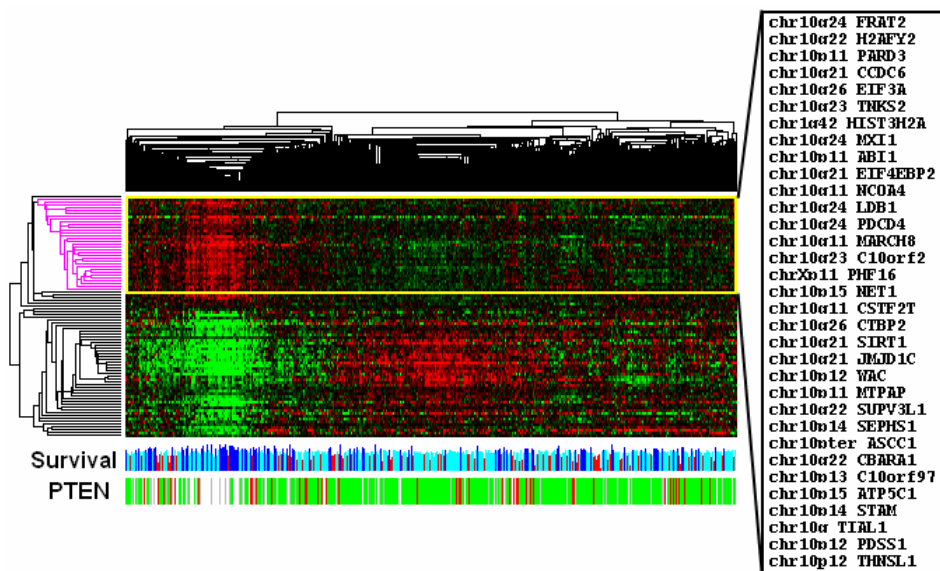

b

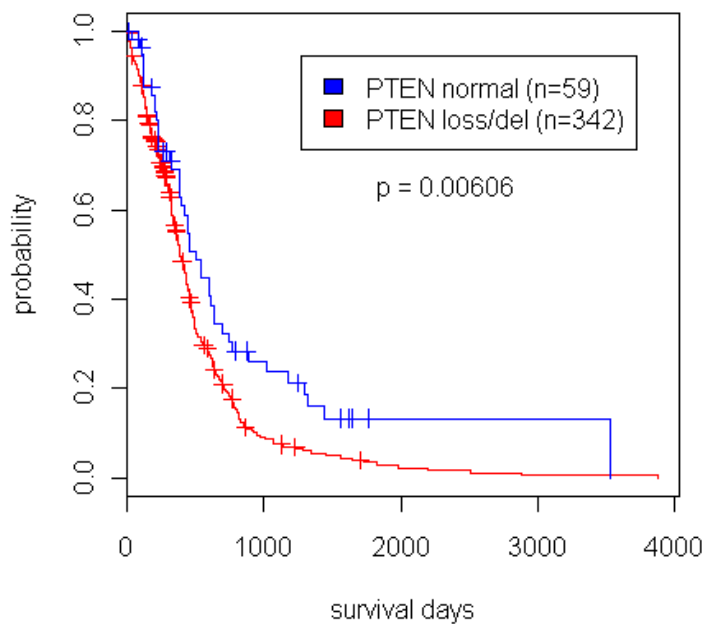

Supplement: pone.0045894.s002.pdf [file pone.0045894.s002.pdf]
